# Supplementary material for: Systems Biomedicine of Rabies Delineates the Affected Signaling Pathways
Source: PubMed Central journal article supplement (PMC5098112; doi:10.3389/fmicb.2016.01688), 2016-11-07

# Degree Distribution

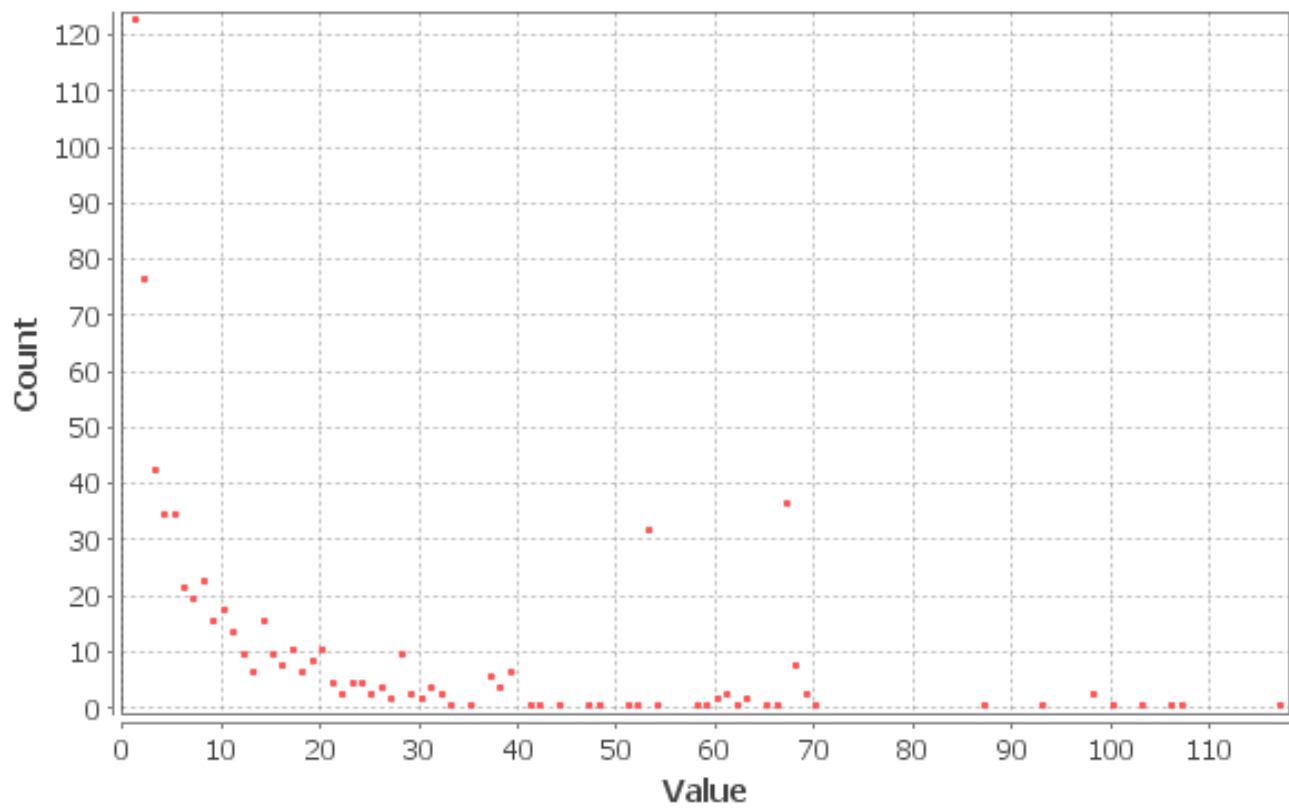

Supplement: Image1.pdf [file Image1.pdf]
